# Supplementary material
Source: PubMed Central journal article supplement (PMC3192477)
Supplement: supp_110.008466_ajcn008466-file001.pdf [file supp_110.008466_ajcn008466-file001.pdf]

**Online Supplemental Material: Supplemental Table 1.** Trends in mean portion sizes (kcal) of selected foods and mean total portion sizes (kcal) of eating occasions during which selected foods were consumed in U.S. children and adolescents 2-18 y old, nationally representative 1977-2006<sup>1</sup>.

|                            | Children 2-6 y old              |                                 |                | Children 7-12 y old           |                               |                | Adolescents 13-18 y old       |                               |                |
|----------------------------|---------------------------------|---------------------------------|----------------|-------------------------------|-------------------------------|----------------|-------------------------------|-------------------------------|----------------|
|                            | Food<br>Mean ± SE               | Eating Occasion<br>Mean ± SE    | % <sup>2</sup> | Food<br>Mean ± SE             | Eating Occasion<br>Mean ± SE  | % <sup>2</sup> | Food<br>Mean ± SE             | Eating Occasion<br>Mean ± SE  | % <sup>2</sup> |
| <b>SALTY SNACKS (kcal)</b> |                                 | n= 5418                         |                |                               | n= 4003                       |                |                               | n= 3682                       |                |
| 1977-78                    | 90.94 ± 3.10                    | 464.47 ± 8.41                   | 20             | 117.29 ± 3.91                 | 658.42 ± 10.22                | 18             | 138.52 ± 4.91                 | 736.60 ± 13.34                | 19             |
| 1989-91                    | 115.96 ± 6.39 <sup>3</sup>      | 487.46 ± 5.55                   | 24             | 173.23 ± 16.43 <sup>3</sup>   | 703.83 ± 28.20                | 25             | 174.49 ± 18.31                | 708.51 ± 49.53                | 25             |
| 1994-98                    | 117.92 ± 3.20 <sup>3</sup>      | 512.14 ± 8.77 <sup>3</sup>      | 23             | 152.10 ± 6.76 <sup>3</sup>    | 659.39 ± 15.14                | 23             | 216.12 ± 12.26 <sup>3</sup>   | 780.31 ± 24.45                | 28             |
| 2003-6                     | 115.29 ± 2.96 <sup>3</sup>      | 496.08 ± 13.96                  | 23             | 168.36 ± 8.27 <sup>3</sup>    | 702.43 ± 19.21                | 24             | 198.82 ± 6.13 <sup>3</sup>    | 791.54 ± 16.08 <sup>3</sup>   | 25             |
| <b>DESSERTS (kcal)</b>     |                                 | n= 7508                         |                |                               | n= 8240                       |                |                               | n= 7259                       |                |
| 1977-78                    | 164.73 ± 3.36                   | 565.79 ± 6.47                   | 29             | 208.00 ± 3.55                 | 757.67 ± 7.53                 | 27             | 251.94 ± 4.58                 | 869.09 ± 8.87                 | 29             |
| 1989-91                    | 186.51 ± 12.42                  | 583.03 ± 23.63                  | 32             | 221.43 ± 13.01                | 766.12 ± 41.68                | 29             | 283.90 ± 14.20                | 945.76 ± 28.10                | 30             |
| 1994-98                    | 181.99 ± 3.53 <sup>3</sup>      | 556.65 ± 6.72                   | 33             | 232.94 ± 6.57 <sup>3</sup>    | 702.02 ± 16.29 <sup>3</sup>   | 33             | 310.98 ± 14.82 <sup>3</sup>   | 862.72 ± 34.05                | 36             |
| 2003-6                     | 161.41 ± 5.83 <sup>3</sup>      | 553.39 ± 15.42                  | 29             | 235.53 ± 7.56 <sup>3</sup>    | 713.85 ± 11.47 <sup>3</sup>   | 33             | 268.16 ± 6.29                 | 797.32 ± 19.96 <sup>3,4</sup> | 34             |
| <b>SOFT DRINKS (kcal)</b>  |                                 | n= 6196                         |                |                               | n= 5488                       |                |                               | n= 9008                       |                |
| 1977-78                    | 88.04 ± 1.77                    | 477.54 ± 10.92                  | 18             | 115.32 ± 1.93                 | 653.14 ± 8.57                 | 18             | 139.53 ± 1.91                 | 753.92 ± 10.11                | 19             |
| 1989-91                    | 103.66 ± 3.53 <sup>3</sup>      | 536.19 ± 9.17 <sup>3</sup>      | 19             | 130.68 ± 2.77 <sup>3</sup>    | 693.91 ± 15.78                | 19             | 160.97 ± 4.08 <sup>3</sup>    | 791.63 ± 28.11                | 20             |
| 1994-98                    | 99.69 ± 1.95 <sup>3</sup>       | 510.02 ± 7.21                   | 20             | 144.77 ± 3.43 <sup>3,4</sup>  | 713.35 ± 14.43 <sup>3</sup>   | 20             | 188.75 ± 4.60 <sup>3,4</sup>  | 875.81 ± 17.28 <sup>3</sup>   | 22             |
| 2003-6                     | 92.16 ± 2.73                    | 555.41 ± 14.64 <sup>3</sup>     | 17             | 137.65 ± 2.72 <sup>3</sup>    | 753.46 ± 13.55 <sup>3</sup>   | 18             | 190.17 ± 5.17 <sup>3,4</sup>  | 911.32 ± 16.31 <sup>3,4</sup> | 21             |
| <b>FRUIT DRINKS (kcal)</b> |                                 | n= 7946                         |                |                               | n= 4959                       |                |                               | n= 4082                       |                |
| 1977-78                    | 87.55 ± 1.66                    | 465.15 ± 8.46                   | 19             | 109.01 ± 2.26                 | 620.67 ± 9.50                 | 18             | 126.18 ± 2.79                 | 757.85 ± 17.18                | 17             |
| 1989-91                    | 97.68 ± 3.86                    | 502.67 ± 28.55                  | 19             | 134.71 ± 12.77                | 707.33 ± 31.09                | 19             | 134.63 ± 4.75                 | 783.93 ± 21.06                | 17             |
| 1994-98                    | 104.34 ± 1.69 <sup>3</sup>      | 479.89 ± 6.45                   | 22             | 127.03 ± 2.10 <sup>3</sup>    | 652.11 ± 13.46                | 19             | 183.54 ± 6.01 <sup>3,4</sup>  | 846.59 ± 25.75                | 22             |
| 2003-6                     | 101.47 ± 3.59 <sup>3</sup>      | 493.96 ± 13.66                  | 21             | 126.95 ± 3.56 <sup>3</sup>    | 634.09 ± 11.84                | 20             | 173.73 ± 4.20 <sup>3,4</sup>  | 831.73 ± 15.19 <sup>3</sup>   | 21             |
| <b>FRENCH-FRIES (kcal)</b> |                                 | n= 4517                         |                |                               | n= 3353                       |                |                               | n= 4156                       |                |
| 1977-78                    | 132.37 ± 3.08                   | 564.19 ± 10.06                  | 23             | 169.14 ± 4.09                 | 764.19 ± 9.70                 | 22             | 197.78 ± 4.87                 | 875.70 ± 10.39                | 23             |
| 1989-91                    | 181.76 ± 7.68 <sup>3</sup>      | 563.27 ± 17.34                  | 32             | 223.52 ± 22.46                | 807.46 ± 39.31                | 28             | 265.26 ± 5.83 <sup>3</sup>    | 939.09 ± 45.74                | 28             |
| 1994-98                    | 154.17 ± 2.67 <sup>3</sup>      | 532.77 ± 6.58                   | 29             | 201.50 ± 5.40 <sup>3</sup>    | 753.22 ± 19.14                | 27             | 263.07 ± 6.78 <sup>3</sup>    | 984.62 ± 30.96 <sup>3</sup>   | 27             |
| 2003-6                     | 154.77 ± 6.56 <sup>3,4</sup>    | 558.26 ± 15.98                  | 28             | 189.99 ± 5.50 <sup>3</sup>    | 757.39 ± 16.14                | 25             | 260.47 ± 6.44 <sup>3</sup>    | 947.51 ± 17.30 <sup>3</sup>   | 27             |
| <b>BURGERS (kcal)</b>      |                                 | n= 1284                         |                |                               | n= 973                        |                |                               | n= 1482                       |                |
| 1977-78                    | 274.20 ± 11.03                  | 525.15 ± 18.81                  | 52             | 353.26 ± 10.42                | 708.50 ± 18.71                | 50             | 396.38 ± 10.73                | 746.05 ± 18.19                | 53             |
| 1989-91                    | 290.42 ± 24.80                  | 615.95 ± 6.93 <sup>3</sup>      | 47             | 356.94 ± 20.34                | 718.53 ± 45.34                | 50             | 482.21 ± 36.64                | 922.42 ± 77.11                | 52             |
| 1994-98                    | 252.34 ± 7.36                   | 525.25 ± 7.89 <sup>4</sup>      | 48             | 408.62 ± 23.13                | 786.57 ± 28.20                | 52             | 554.31 ± 20.82 <sup>3</sup>   | 1075.73 ± 31.02 <sup>3</sup>  | 52             |
| 2003-6                     | 321.91 ± 23.22                  | 627.00 ± 36.76                  | 51             | 421.96 ± 13.39 <sup>3</sup>   | 841.40 ± 22.89 <sup>3</sup>   | 50             | 546.55 ± 10.63 <sup>3</sup>   | 1029.33 ± 22.94 <sup>3</sup>  | 53             |
| <b>PIZZA (kcal)</b>        |                                 | n= 2438                         |                |                               | n= 2292                       |                |                               | n= 2373                       |                |
| 1977-78                    | 278.34 ± 12.48                  | 446.85 ± 16.51                  | 62             | 367.83 ± 14.64                | 643.43 ± 17.10                | 57             | 478.97 ± 15.19                | 780.48 ± 18.45                | 61             |
| 1989-91                    | 274.66 ± 12.14                  | 446.04 ± 24.19                  | 62             | 423.07 ± 31.42                | 663.07 ± 33.79                | 64             | 586.02 ± 62.10                | 787.66 ± 78.60                | 74             |
| 1994-98                    | 252.79 ± 8.30                   | 420.78 ± 11.40                  | 60             | 325.52 ± 13.48 <sup>4</sup>   | 557.13 ± 20.28 <sup>3</sup>   | 58             | 504.51 ± 29.07                | 794.47 ± 34.66                | 64             |
| 2003-6                     | 375.59 ± 14.58 <sup>3,4,5</sup> | 559.39 ± 15.95 <sup>3,4,5</sup> | 67             | 492.39 ± 14.61 <sup>3,5</sup> | 752.27 ± 20.81 <sup>3,5</sup> | 65             | 698.81 ± 17.20 <sup>3,5</sup> | 957.85 ± 18.12 <sup>3,5</sup> | 73             |
| <b>MEXICAN FOOD (kcal)</b> |                                 | n= 716                          |                |                               | n= 787                        |                |                               | n= 985                        |                |
| 1977-78                    | 243.55 ± 20.49                  | 471.60 ± 35.64                  | 52             | 392.61 ± 28.56                | 720.11 ± 32.28                | 55             | 408.68 ± 30.56                | 812.28 ± 50.33                | 50             |
| 1989-91                    | 278.61 ± 23.94                  | 479.62 ± 37.15                  | 58             | 317.42 ± 27.41                | 612.95 ± 62.04                | 52             | 362.97 ± 36.69                | 718.27 ± 84.31                | 51             |
| 1994-98                    | 299.98 ± 16.76                  | 518.60 ± 18.30                  | 58             | 447.45 ± 21.91 <sup>4</sup>   | 756.66 ± 43.04                | 59             | 532.16 ± 30.99 <sup>4</sup>   | 907.35 ± 49.32                | 59             |
| 2003-6                     | 348.24 ± 20.05 <sup>3</sup>     | 552.25 ± 24.90                  | 63             | 471.22 ± 22.67 <sup>4</sup>   | 748.64 ± 26.44                | 63             | 613.68 ± 22.35 <sup>3,4</sup> | 942.17 ± 36.63                | 65             |

<sup>1</sup>The analysis sample included respondents aged 2-18 y old from US nationally representative surveys: NFCS 1977-78; CSFII 1989-91; CSFII 1994-98; NHANES 2003-06.

<sup>2</sup>The % kcal was calculated dividing: (kcal from food) / (kcal from eating occasions during which selected foods were consumed) \* 100.

<sup>3-5</sup> Portion size of food and eating occasion is statistically significantly different from <sup>3</sup>1977-78, <sup>4</sup>1989-91, <sup>5</sup>1994-98,  $P < 0.01$  ( $F$  test, Bonferroni-adjusted).

**Online Supplemental Material: Supplemental Table 2.** Trends in mean portion sizes (g/mL) of selected foods in U.S. children and adolescents 2-18 y old, nationally representative 1977-2006<sup>1</sup>.

|                          | Children<br>2-6 y old |                        | Children<br>7-12 y old |                      | Adolescents<br>13-18 y old |                       |
|--------------------------|-----------------------|------------------------|------------------------|----------------------|----------------------------|-----------------------|
|                          | Mean                  | ± SE                   | Mean                   | ± SE                 | Mean                       | ± SE                  |
| <b>SALTY SNACKS (g)</b>  | n= 5418               |                        | n= 4003                |                      | n= 3682                    |                       |
| 1977-78                  | 18.5                  | ± 0.7                  | 23.3                   | ± 0.9                | 27.6                       | ± 1.0                 |
| 1989-91                  | 23.2                  | ± 1.3 <sup>3</sup>     | 34.7                   | ± 3.4 <sup>3</sup>   | 34.7                       | ± 3.5                 |
| 1994-98                  | 23.7                  | ± 0.6 <sup>3</sup>     | 30.2                   | ± 1.3 <sup>3</sup>   | 43.6                       | ± 2.4 <sup>3</sup>    |
| 2003-6                   | 23.2                  | ± 0.6 <sup>3</sup>     | 34.5                   | ± 1.7 <sup>3</sup>   | 40.1                       | ± 1.3 <sup>3</sup>    |
| <b>DESSERTS (g)</b>      | n= 7508               |                        | n= 8240                |                      | n= 7259                    |                       |
| 1977-78                  | 71.5                  | ± 1.8                  | 86.1                   | ± 1.9                | 100.0                      | ± 1.9                 |
| 1989-91                  | 76.6                  | ± 3.1                  | 89.6                   | ± 8.2                | 111.0                      | ± 3.5                 |
| 1994-98                  | 72.2                  | ± 1.9                  | 87.2                   | ± 2.9                | 112.9                      | ± 5.7                 |
| 2003-6                   | 62.5                  | ± 2.2 <sup>3,4,5</sup> | 86.1                   | ± 3.5                | 91.8                       | ± 2.9 <sup>4,5</sup>  |
| <b>SOFT DRINKS (mL)</b>  | n= 6196               |                        | n= 5488                |                      | n= 9008                    |                       |
| 1977-78                  | 216.3                 | ± 4.3                  | 282.4                  | ± 4.5                | 342.0                      | ± 4.7                 |
| 1989-91                  | 254.7                 | ± 8.6 <sup>3</sup>     | 321.6                  | ± 6.5 <sup>3</sup>   | 396.3                      | ± 10.5 <sup>3</sup>   |
| 1994-98                  | 246.0                 | ± 4.8 <sup>3</sup>     | 356.3                  | ± 8.4 <sup>3,4</sup> | 463.8                      | ± 11.2 <sup>3,4</sup> |
| 2003-6                   | 236.4                 | ± 7.2                  | 356.4                  | ± 7.4 <sup>3,4</sup> | 493.7                      | ± 13.8 <sup>3,4</sup> |
| <b>FRUIT DRINKS (mL)</b> | n= 7946               |                        | n= 4959                |                      | n= 4082                    |                       |
| 1977-78                  | 221.7                 | ± 3.9                  | 271.0                  | ± 4.9                | 312.0                      | ± 6.7                 |
| 1989-91                  | 249.6                 | ± 11.2                 | 313.2                  | ± 19.1               | 343.0                      | ± 11.2                |
| 1994-98                  | 241.1                 | ± 3.5 <sup>3</sup>     | 300.8                  | ± 6.6 <sup>3</sup>   | 418.3                      | ± 12.1 <sup>3,4</sup> |
| 2003-6                   | 231.4                 | ± 9.1                  | 288.0                  | ± 8.4                | 396.3                      | ± 7.6 <sup>3,4</sup>  |
| <b>FRENCH-FRIES (g)</b>  | n= 4517               |                        | n= 3353                |                      | n= 4156                    |                       |
| 1977-78                  | 59.4                  | ± 2.0                  | 75.0                   | ± 2.0                | 86.0                       | ± 2.7                 |
| 1989-91                  | 67.2                  | ± 2.3                  | 86.5                   | ± 8.9                | 109.0                      | ± 3.5 <sup>3</sup>    |
| 1994-98                  | 58.3                  | ± 1.3 <sup>4</sup>     | 75.2                   | ± 1.8                | 95.9                       | ± 2.4                 |
| 2003-6                   | 54.9                  | ± 2.2 <sup>4</sup>     | 66.3                   | ± 1.9 <sup>3,5</sup> | 89.8                       | ± 2.3 <sup>4</sup>    |
| <b>BURGERS (g)</b>       | n= 1284               |                        | n= 973                 |                      | n= 1482                    |                       |
| 1977-78                  | 112.8                 | ± 4.1                  | 145.3                  | ± 4.3                | 162.7                      | ± 4.4                 |
| 1989-91                  | 117.6                 | ± 9.5                  | 141.4                  | ± 6.6                | 192.4                      | ± 14.6                |
| 1994-98                  | 103.2                 | ± 2.9                  | 161.2                  | ± 8.7                | 217.5                      | ± 8.7 <sup>3</sup>    |
| 2003-6                   | 121.5                 | ± 9.2                  | 161.0                  | ± 5.2                | 213.2                      | ± 4.1 <sup>3</sup>    |
| <b>PIZZA (g)</b>         | n= 2438               |                        | n= 2292                |                      | n= 2373                    |                       |
| 1977-78                  | 99.7                  | ± 4.5                  | 133.2                  | ± 5.1                | 172.7                      | ± 5.3                 |
| 1989-91                  | 100.5                 | ± 4.7                  | 148.3                  | ± 10.5               | 206.7                      | ± 20.7                |
| 1994-98                  | 89.8                  | ± 2.8                  | 115.0                  | ± 4.7 <sup>4</sup>   | 177.4                      | ± 9.7                 |
| 2003-6                   | 131.4                 | ± 4.9 <sup>3,4,5</sup> | 171.0                  | ± 4.8 <sup>3,5</sup> | 242.0                      | ± 5.8 <sup>3,5</sup>  |
| <b>MEXICAN FOOD (g)</b>  | n= 716                |                        | n= 787                 |                      | n= 985                     |                       |
| 1977-78                  | 106.8                 | ± 8.6                  | 172.9                  | ± 12.8               | 177.9                      | ± 12.7                |
| 1989-91                  | 119.5                 | ± 8.0                  | 139.6                  | ± 9.1                | 155.5                      | ± 12.6                |
| 1994-98                  | 121.6                 | ± 6.4                  | 179.9                  | ± 9.7                | 224.7                      | ± 11.7 <sup>4</sup>   |
| 2003-6                   | 135.8                 | ± 7.7                  | 190.6                  | ± 8.9 <sup>4</sup>   | 250.0                      | ± 9.6 <sup>3,4</sup>  |

<sup>1</sup>The analysis sample included respondents aged 2-18 y old from US nationally representative surveys: NFCS 1977-78; CSFII 1989-91; CSFII 1994-98; NHANES 2003-06.

<sup>3-5</sup> Portion size of food (g) is statistically significantly different from <sup>3</sup>1977-78, <sup>4</sup>1989-91, <sup>5</sup>1994-98,  $P < 0.01$  ( $F$  test, Bonferroni-adjusted).
